# Supplementary material for: Investigation of the electronic and magnetic properties of bare and oxygen-terminated ordered double transition-metal MXenes for spintronic applications
Source: Royal Society of Chemistry journal article supplement (doi:10.1039/d4cp03396e), 2024-01-01
Supplement: d4cp03396e1.pdf [file d4cp03396e1.pdf]

## Supplementary Information: Investigation of the electronic and magnetic properties of bare and surface functionalized double ordered MXenes for spintronic devices

Aymila Akyildiz,<sup>a</sup> Isil Ilgaz Aysan,<sup>b</sup> Yusuf Zuntu Abdullahi,<sup>b</sup> Berna Akgenc Hanedar,<sup>\*c</sup> Zeynep Demir Vatansever,<sup>†a</sup> and Fatih Ersan<sup>‡b</sup>

### 1 Linear response approach

We used linear response approach formulated by Cococcioni et al.<sup>1</sup> to evaluate the  $U$  parameters for DTM structures.

Quantum ESPRESSO (QE) code<sup>2</sup> was used for the LRA calculations. To produce results with negligible error, we make sure that similar computational parameters, such as PAW PPs, are used for both VASP and QE computations.

A typical example of LRA calculations for  $\text{Cr}_3\text{C}_2$  and  $\text{Cr}_3\text{C}_2\text{O}_2$  are displayed in Fig. S1. We first determine  $x_0$  and  $x$  which represent the non-interacting (bare) and interacting density response functions of the system with respect to localized perturbations. The parameter  $U_{eff}$  is then evaluated from the expression:  $U_{eff} = (x_0^{-1} - x^{-1})$ .

---

<sup>a</sup> Department of Physics, Dokuz Eylul University, İzmir 35160, Turkey; E-mail: zeynep.demir@deu.edu.tr

<sup>b</sup> Department of Physics, Aydin Adnan Menderes University, Aydin 09010, Turkey; E-mail: fatih.ersan@adu.edu.tr

<sup>c</sup> Department of Physics, Kırklareli University, Kırklareli 39100, Turkey; E-mail: berna.akgenc@klu.edu.tr

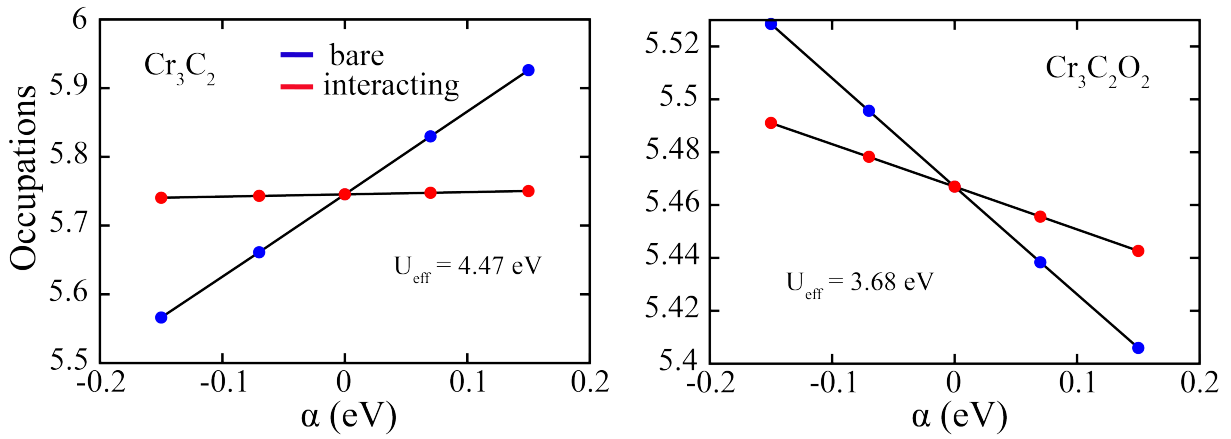

Fig. 1 Linear response of  $d$  orbital occupations as a function of potential shift  $\alpha$ . The curves depicted by the squares and circles lines are labeled bare and interacting. The inverse response functions are deduced numerically by calculating the slope of the curves.  $x_0$  follows from the slope of curve bare, whereas  $x$  from the slope of curve interacting.

Table 1 The calculated  $U_{eff}$  values in eV for each metal atom in bare and oxygen-terminated MXene monolayer structures.

| Mxene                                           | Ti   | V    | Cr   | Zr   | Nb   | Mo   | Ta   |
|-------------------------------------------------|------|------|------|------|------|------|------|
| Cr <sub>3</sub> C <sub>2</sub>                  |      |      | 4.71 |      |      |      |      |
| Ti <sub>3</sub> C <sub>2</sub>                  | 3.06 |      |      |      |      |      |      |
| Zr <sub>3</sub> C <sub>2</sub>                  |      |      |      | 2.06 |      |      |      |
| Cr <sub>2</sub> NbC <sub>2</sub>                |      |      | 3.67 |      | 3.30 |      |      |
| Cr <sub>2</sub> TaC <sub>2</sub>                |      |      | 3.97 |      |      |      | 4.06 |
| Cr <sub>2</sub> TiC <sub>2</sub>                | 4.07 |      | 5.11 |      |      |      |      |
| Cr <sub>2</sub> VC <sub>2</sub>                 |      | 4.40 | 4.26 |      |      |      |      |
| Mo <sub>2</sub> NbC <sub>2</sub>                |      |      |      |      | 4.12 | 4.11 |      |
| Mo <sub>2</sub> TaC <sub>2</sub>                |      |      |      |      |      | 4.10 | 4.14 |
| Mo <sub>2</sub> TiC <sub>2</sub>                | 4.06 |      |      |      |      | 4.00 |      |
| Mo <sub>2</sub> VC <sub>2</sub>                 |      | 4.06 |      |      |      | 4.14 |      |
| Ti <sub>2</sub> NbC <sub>2</sub>                | 3.41 |      |      |      | 3.47 |      |      |
| Ti <sub>2</sub> TaC <sub>2</sub>                | 3.41 |      |      |      |      |      | 3.71 |
| Cr <sub>3</sub> C <sub>2</sub> O <sub>2</sub>   |      |      | 3.68 |      |      |      |      |
| Ti <sub>3</sub> C <sub>2</sub> O <sub>2</sub>   | 3.13 |      |      |      |      |      |      |
| Zr <sub>3</sub> C <sub>2</sub> O <sub>2</sub>   |      |      |      | 1.81 |      |      |      |
| Cr <sub>2</sub> NbC <sub>2</sub> O <sub>2</sub> |      |      | 3.98 |      | 3.13 |      |      |
| Cr <sub>2</sub> TaC <sub>2</sub> O <sub>2</sub> |      |      | 3.98 |      |      |      | 2.72 |
| Cr <sub>2</sub> TiC <sub>2</sub> O <sub>2</sub> | 3.67 |      | 5.43 |      |      |      |      |
| Cr <sub>2</sub> VC <sub>2</sub> O <sub>2</sub>  |      | 4.73 | 4.33 |      |      |      |      |
| Mo <sub>2</sub> NbC <sub>2</sub> O <sub>2</sub> |      |      |      |      | 3.25 | 4.02 |      |
| Mo <sub>2</sub> TaC <sub>2</sub> O <sub>2</sub> |      |      |      |      |      | 4.02 | 2.88 |
| Mo <sub>2</sub> TiC <sub>2</sub> O <sub>2</sub> | 3.46 |      |      |      |      | 4.00 |      |
| Mo <sub>2</sub> VC <sub>2</sub> O <sub>2</sub>  |      | 4.48 |      |      |      | 4.09 |      |
| Ti <sub>2</sub> NbC <sub>2</sub> O <sub>2</sub> | 3.39 |      |      |      | 3.06 |      |      |
| Ti <sub>2</sub> TaC <sub>2</sub> O <sub>2</sub> | 3.40 |      |      |      |      |      | 2.67 |

Table 2 The calculated adsorption energy values (eV) for per oxygen atom on MXenes structures are tabulated with the favorable adsorption site.

|           | Cr <sub>3</sub> C <sub>2</sub> O <sub>2</sub> | Ti <sub>3</sub> C <sub>2</sub> O <sub>2</sub> | Zr <sub>3</sub> C <sub>2</sub> O <sub>2</sub> | Cr <sub>2</sub> NbC <sub>2</sub> O <sub>2</sub> | Cr <sub>2</sub> TaC <sub>2</sub> O <sub>2</sub> | Cr <sub>2</sub> TiC <sub>2</sub> O <sub>2</sub> | Cr <sub>2</sub> VC <sub>2</sub> O <sub>2</sub> | Mo <sub>2</sub> NbC <sub>2</sub> O <sub>2</sub> | Mo <sub>2</sub> TaC <sub>2</sub> O <sub>2</sub> | Mo <sub>2</sub> TiC <sub>2</sub> O <sub>2</sub> | Mo <sub>2</sub> VC <sub>2</sub> O <sub>2</sub> | Ti <sub>2</sub> NbC <sub>2</sub> O <sub>2</sub> | Ti <sub>2</sub> TaC <sub>2</sub> O <sub>2</sub> |
|-----------|-----------------------------------------------|-----------------------------------------------|-----------------------------------------------|-------------------------------------------------|-------------------------------------------------|-------------------------------------------------|------------------------------------------------|-------------------------------------------------|-------------------------------------------------|-------------------------------------------------|------------------------------------------------|-------------------------------------------------|-------------------------------------------------|
| $E_{ads}$ | -6.61                                         | -8.17                                         | -8.71                                         | -6.46                                           | -6.57                                           | -6.60                                           | -6.60                                          | -6.97                                           | -7.01                                           | -7.27                                           | -7.12                                          | -8.13                                           | -8.23                                           |
| Ads. Site | C                                             | C                                             | C                                             | C                                               | C                                               | B                                               | C                                              | B                                               | B                                               | B                                               | B                                              | C                                               | C                                               |

Table 3 The optimized lattice constants  $a = b$  (Å) of the bare oxygen terminated MXenes

| MXene | Cr <sub>3</sub> C <sub>2</sub>                | Ti <sub>3</sub> C <sub>2</sub>                | Zr <sub>3</sub> C <sub>2</sub>                | Cr <sub>2</sub> NbC <sub>2</sub>                | Cr <sub>2</sub> TaC <sub>2</sub>                | Cr <sub>2</sub> TiC <sub>2</sub>                | Cr <sub>2</sub> VC <sub>2</sub>                | Mo <sub>2</sub> NbC <sub>2</sub>                | Mo <sub>2</sub> TaC <sub>2</sub>                | Mo <sub>2</sub> TiC <sub>2</sub>                | Mo <sub>2</sub> VC <sub>2</sub>                | Ti <sub>2</sub> NbC <sub>2</sub>                | Ti <sub>2</sub> TaC <sub>2</sub>                |
|-------|-----------------------------------------------|-----------------------------------------------|-----------------------------------------------|-------------------------------------------------|-------------------------------------------------|-------------------------------------------------|------------------------------------------------|-------------------------------------------------|-------------------------------------------------|-------------------------------------------------|------------------------------------------------|-------------------------------------------------|-------------------------------------------------|
| wo-U  | 3.025                                         | 3.097                                         | 3.344                                         | 3.121                                           | 3.102                                           | 3.078                                           | 3.006                                          | 3.043                                           | 3.026                                           | 2.960                                           | 2.940                                          | 3.139                                           | 3.123                                           |
| w-U   | 3.162                                         | 3.128                                         | 3.371                                         | 3.148                                           | 3.196                                           | 3.153                                           | 3.087                                          | 3.161                                           | 3.163                                           | 3.084                                           | 3.032                                          | 3.163                                           | 3.152                                           |
| MXene | Cr <sub>3</sub> C <sub>2</sub> O <sub>2</sub> | Ti <sub>3</sub> C <sub>2</sub> O <sub>2</sub> | Zr <sub>3</sub> C <sub>2</sub> O <sub>2</sub> | Cr <sub>2</sub> NbC <sub>2</sub> O <sub>2</sub> | Cr <sub>2</sub> TaC <sub>2</sub> O <sub>2</sub> | Cr <sub>2</sub> TiC <sub>2</sub> O <sub>2</sub> | Cr <sub>2</sub> VC <sub>2</sub> O <sub>2</sub> | Mo <sub>2</sub> NbC <sub>2</sub> O <sub>2</sub> | Mo <sub>2</sub> TaC <sub>2</sub> O <sub>2</sub> | Mo <sub>2</sub> TiC <sub>2</sub> O <sub>2</sub> | Mo <sub>2</sub> VC <sub>2</sub> O <sub>2</sub> | Ti <sub>2</sub> NbC <sub>2</sub> O <sub>2</sub> | Ti <sub>2</sub> TaC <sub>2</sub> O <sub>2</sub> |
| wo-U  | 2.954                                         | 3.013                                         | 3.278                                         | 3.114                                           | 3.107                                           | 3.099                                           | 3.011                                          | 3.002                                           | 3.003                                           | 2.842                                           | 2.911                                          | 3.004                                           | 3.061                                           |
| w-U   | 2.954                                         | 3.084                                         | 3.316                                         | 3.114                                           | 3.106                                           | 3.078                                           | 3.010                                          | 2.298                                           | 2.974                                           | 2.963                                           | 2.927                                          | 3.108                                           | 3.103                                           |

Table 4 The calculated cohesive ( $E_{coh}$ ) and formation ( $E_f$ ) energy vaules in eV/atom for bare monolayer MXene structures.

| MXene     | Cr <sub>3</sub> C <sub>2</sub> | Ti <sub>3</sub> C <sub>2</sub> | Zr <sub>3</sub> C <sub>2</sub> | Cr <sub>2</sub> NbC <sub>2</sub> | Cr <sub>2</sub> TaC <sub>2</sub> | Cr <sub>2</sub> TiC <sub>2</sub> | Cr <sub>2</sub> VC <sub>2</sub> | Mo <sub>2</sub> NbC <sub>2</sub> | Mo <sub>2</sub> TaC <sub>2</sub> | Mo <sub>2</sub> TiC <sub>2</sub> | Mo <sub>2</sub> VC <sub>2</sub> | Ti <sub>2</sub> NbC <sub>2</sub> | Ti <sub>2</sub> TaC <sub>2</sub> |
|-----------|--------------------------------|--------------------------------|--------------------------------|----------------------------------|----------------------------------|----------------------------------|---------------------------------|----------------------------------|----------------------------------|----------------------------------|---------------------------------|----------------------------------|----------------------------------|
| $E_{coh}$ | 5.419                          | 7.167                          | 7.731                          | 6.339                            | 6.648                            | 6.079                            | 6.024                           | 7.272                            | 7.601                            | 7.078                            | 6.986                           | 7.447                            | 7.759                            |
| $E_f$     | 0.242                          | -0.352                         | -0.331                         | 0.053                            | 0.118                            | -0.033                           | 0.108                           | 0.296                            | 0.341                            | 0.144                            | 0.322                           | -0.286                           | -0.225                           |

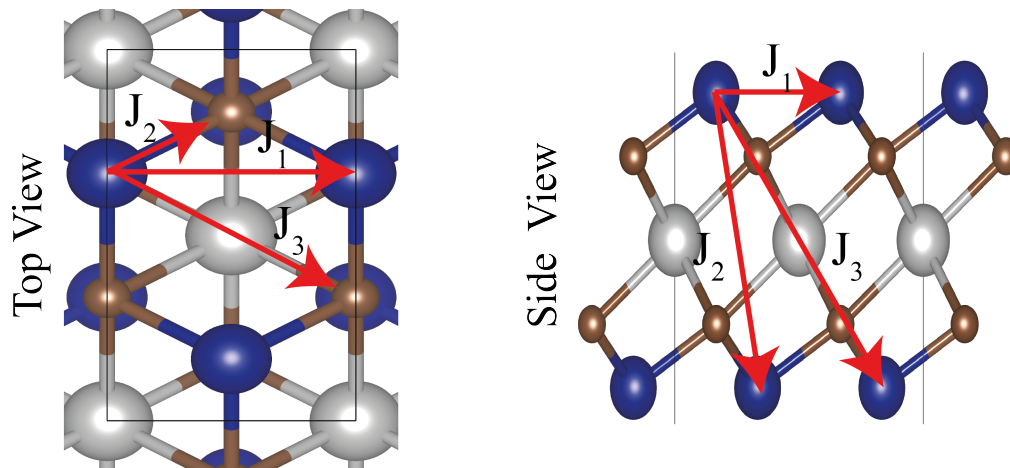

Fig. 2 Top and side views of the MXene structures with the rectangular cells. The nearest-, next-nearest- and next-next-nearest-neighbor exchange coupling parameters ( $J_1$ ,  $J_2$  and  $J_3$ , respectively) shown by arrows.

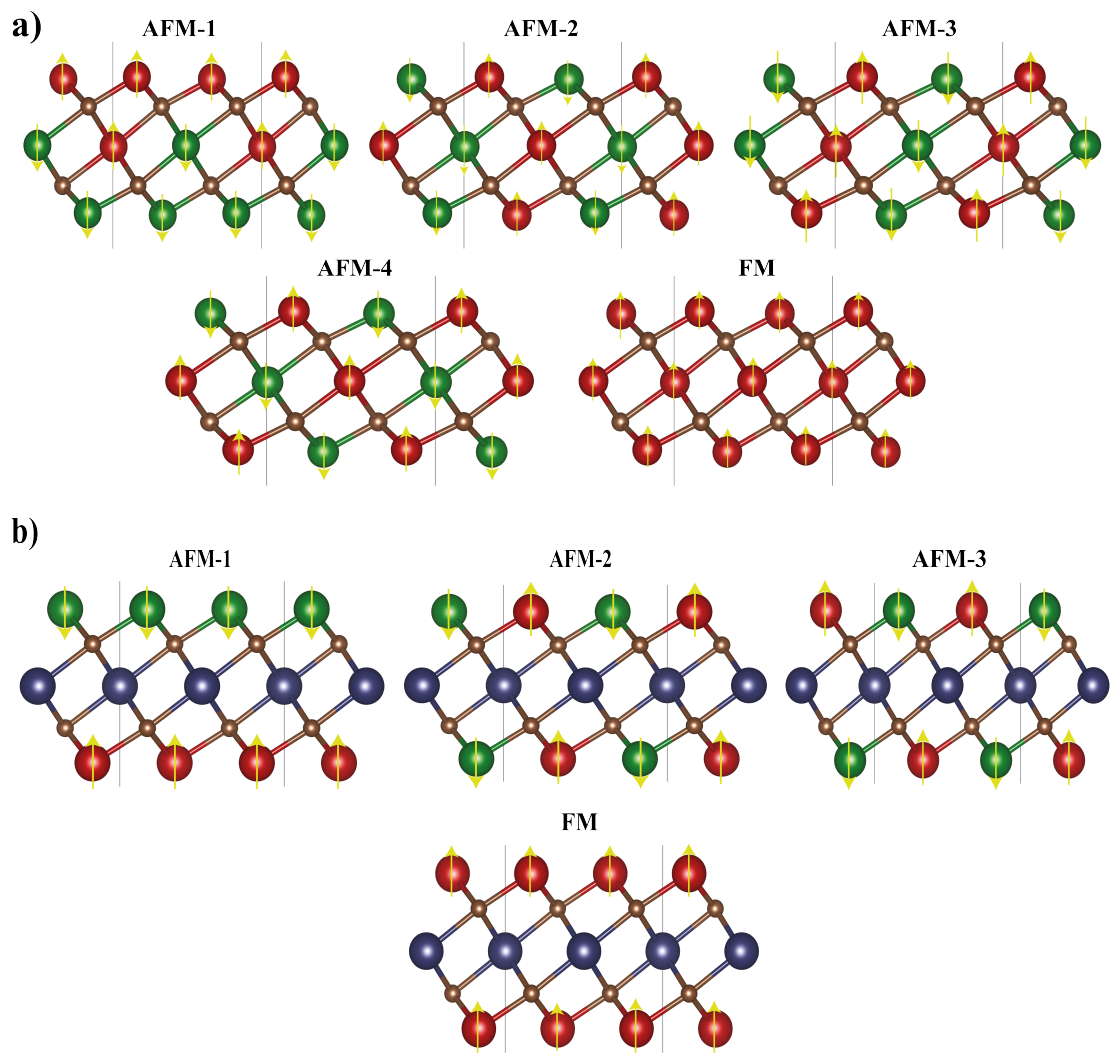

Fig. 3 Magnetic orientations for a) each metal layer atoms have magnetic moment b) middle metal layer atoms have no magnetic moment. Red and green balls illustrate spin-up and spin-down orientation, respectively.

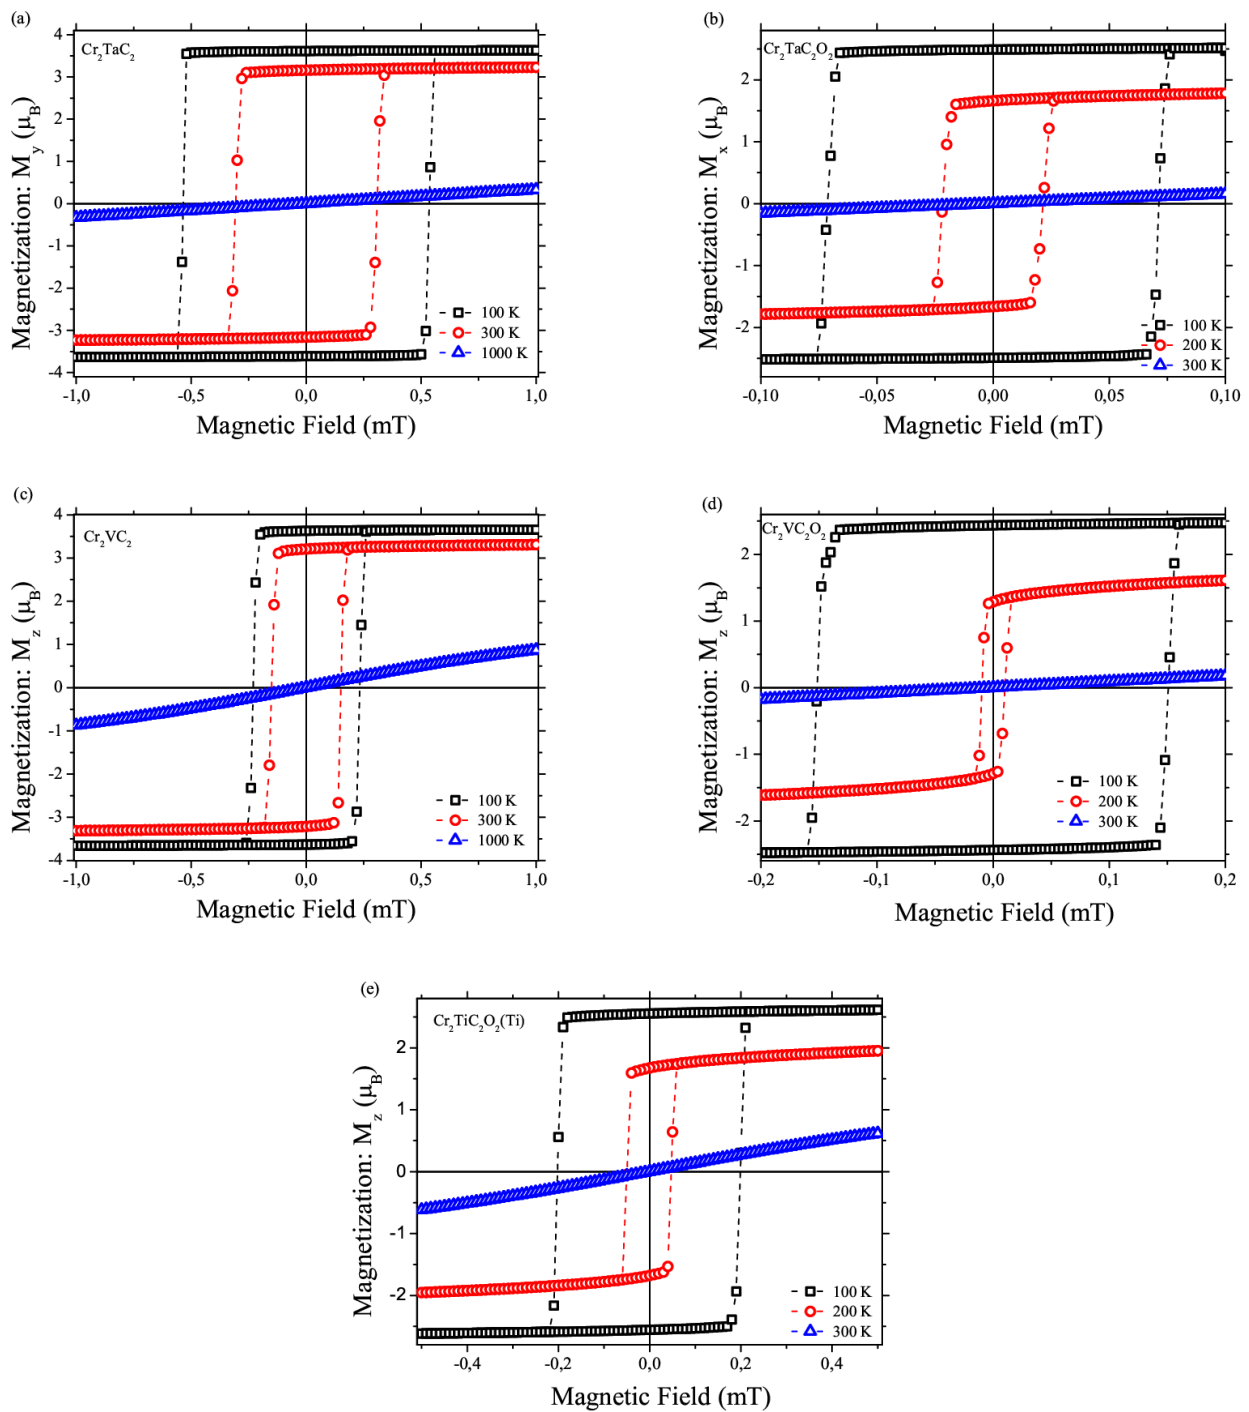

Fig. 4 Hysteresis curves of Cr-based MXene structures at several temperatures. .

Table 5 Total energy value (in unit of eV) per formula unit for different magnetic orientations.

| MXene                                                | AFM1          | AFM2          | AFM3          | FM            |              |
|------------------------------------------------------|---------------|---------------|---------------|---------------|--------------|
| Cr <sub>2</sub> NbC <sub>2</sub>                     | -39.93363466  | -39.89614783  | -39.79280551  | -40.28894902  |              |
| Cr <sub>2</sub> NbC <sub>2</sub> O <sub>2</sub>      | -55.82777373  | -55.73574424  | -55.73539916  | -55.84864899  |              |
| Cr <sub>2</sub> TiC <sub>2</sub>                     | -35.62423928  | -34.8499153   | -34.86805635  | -35.58448503  |              |
| Cr <sub>2</sub> TiC <sub>2</sub> O <sub>2</sub> (C)  | -49.17107243  | -49.18977845  | -49.20004705  | -49.17655127  |              |
| Cr <sub>2</sub> TiC <sub>2</sub> O <sub>2</sub> (Ti) | -50.54057159  | -50.41220599  | -50.424833    | -50.54418349  |              |
| Cr <sub>2</sub> VC <sub>2</sub>                      | -35.55066893  | -35.13583162  | -35.10488067  | -35.58362736  |              |
| Cr <sub>2</sub> VC <sub>2</sub> O <sub>2</sub>       | -51.02206546  | -50.9494969   | -50.95343245  | -51.05433624  |              |
| Cr <sub>2</sub> TaC <sub>2</sub>                     | -40.11820197  | -40.16784456  | -40.10189687  | -40.42710694  |              |
| Cr <sub>2</sub> TaC <sub>2</sub> O <sub>2</sub>      | -57.86943942  | -57.78049557  | -57.77948186  | -57.89734561  |              |
| Ti <sub>3</sub> C <sub>2</sub>                       | -36.539260006 | -36.277446085 | -36.293154265 | -36.43362736  |              |
| Ti <sub>3</sub> C <sub>2</sub> O <sub>2</sub>        | -56.04564962  | -56.045656865 | -56.045654085 | -56.045646315 |              |
| Zr <sub>3</sub> C <sub>2</sub>                       | -42.29698757  | -42.19103438  | -42.18166457  | -42.25272169  |              |
| Zr <sub>3</sub> C <sub>2</sub> O <sub>2</sub>        | -63.84851385  | -63.84851472  | -63.84851494  | -63.84851332  |              |
| Mo <sub>2</sub> NbC <sub>2</sub>                     | -37.773355645 | -38.208717855 | -38.197761875 | -38.078943085 |              |
| Mo <sub>2</sub> TaC <sub>2</sub>                     | -38.713913385 | -39.275342075 | -39.239666205 | -38.72370495  |              |
| Mo <sub>2</sub> TiC <sub>2</sub>                     | -             | -35.49640249  | -35.45696606  | -35.24654412  |              |
| Mo <sub>2</sub> TiC <sub>2</sub> O <sub>2</sub>      | -54.028703125 | -54.028698795 | -54.02869796  | -54.02870732  |              |
| Mo <sub>2</sub> VC <sub>2</sub>                      | -             | -35.06399216  | -35.12091152  | -34.890166165 |              |
| Ti <sub>2</sub> NbC <sub>2</sub>                     | -38.236896235 | -38.158908405 | -38.171593025 | -38.24506252  |              |
| Ti <sub>2</sub> NbC <sub>2</sub> O <sub>2</sub>      | -58.199017165 | -58.19900676  | -58.19900241  | -58.198997465 |              |
| Ti <sub>2</sub> TaC <sub>2</sub>                     | -39.091422545 | -39.024745335 | -39.028009125 | -38.790671305 |              |
| Ti <sub>2</sub> TaC <sub>2</sub> O <sub>2</sub>      | -60.030715305 | -60.030754905 | -60.030730815 | -60.0307384   |              |
| MXene                                                | AFM1          | AFM2          | AFM3          | AFM4          | FM           |
| Cr <sub>3</sub> C <sub>2</sub>                       | -35.49828528  | -34.77116233  | -34.88776263  | -34.59715347  | -35.66359075 |
| Cr <sub>3</sub> C <sub>2</sub> O <sub>2</sub>        | -52.56146121  | -52.43882712  | -52.52808045  | -52.37321699  | -52.73552186 |

Table 6 Total energy value (in unit of eV) per formula unit for the energetically most stable magnetic orientations (including SOC).

| MAE (eV)                                             | 001           | 010           | 100           |
|------------------------------------------------------|---------------|---------------|---------------|
| Cr <sub>3</sub> C <sub>2</sub>                       | -34.27745623  | -34.27745248  | -34.277419025 |
| Cr <sub>3</sub> C <sub>2</sub> O <sub>2</sub>        | -52.743875    | -52.7437452   | -52.7437375   |
| Ti <sub>3</sub> C <sub>2</sub>                       | -36.543246    | -36.5432155   | -36.543217    |
| Ti <sub>3</sub> C <sub>2</sub> O <sub>2</sub>        | -             | -             | -             |
| Zr <sub>3</sub> C <sub>2</sub>                       | -42.3511375   | -42.3507555   | -42.350753    |
| Zr <sub>3</sub> C <sub>2</sub> O <sub>2</sub>        | -             | -             | -             |
| Cr <sub>2</sub> NbC <sub>2</sub>                     | -38.954550355 | -38.95470851  | -38.95418005  |
| Cr <sub>2</sub> NbC <sub>2</sub> O <sub>2</sub>      | -53.84957     | -53.84938     | -53.849615    |
| Cr <sub>2</sub> TaC <sub>2</sub>                     | -38.72029892  | -38.721267595 | -38.721212845 |
| Cr <sub>2</sub> TaC <sub>2</sub> O <sub>2</sub>      | -58.02628     | -58.026137    | -58.02639     |
| Cr <sub>2</sub> TiC <sub>2</sub>                     | -34.379664305 | -34.37962562  | -34.37962554  |
| Cr <sub>2</sub> TiC <sub>2</sub> O <sub>2</sub> (C)  | -49.2059305   | -49.2060275   | -49.2060485   |
| Cr <sub>2</sub> TiC <sub>2</sub> O <sub>2</sub> (Ti) | -50.550565    | -50.550495    | -50.550505    |
| Cr <sub>2</sub> VC <sub>2</sub>                      | -34.356312285 | -34.356284255 | -34.35628311  |
| Cr <sub>2</sub> VC <sub>2</sub> O <sub>2</sub>       | -51.060775    | -51.060725    | -51.06072     |
| Mo <sub>2</sub> NbC <sub>2</sub>                     | -36.48127681  | -36.480902455 | -36.480828575 |
| Mo <sub>2</sub> NbC <sub>2</sub> O <sub>2</sub>      | -             | -             | -             |
| Mo <sub>2</sub> TaC <sub>2</sub>                     | -37.113683915 | -37.11336528  | -37.11384288  |
| Mo <sub>2</sub> TaC <sub>2</sub> O <sub>2</sub>      | -             | -             | -             |
| Mo <sub>2</sub> TiC <sub>2</sub>                     | -33.92451676  | -33.924292    | -33.924938665 |
| Mo <sub>2</sub> TiC <sub>2</sub> O <sub>2</sub>      | -             | -             | -             |
| Mo <sub>2</sub> VC <sub>2</sub>                      | -33.55538638  | -33.55522778  | -33.555568425 |
| Mo <sub>2</sub> VC <sub>2</sub> O <sub>2</sub>       | -             | -             | -             |
| Ti <sub>2</sub> NbC <sub>2</sub>                     | -36.8831069   | -             | -             |
| Ti <sub>2</sub> NbC <sub>2</sub> O <sub>2</sub>      | -             | -             | -             |
| Ti <sub>2</sub> TaC <sub>2</sub>                     | -             | -             | -             |
| Ti <sub>2</sub> TaC <sub>2</sub> O <sub>2</sub>      | -             | -             | -             |

## Notes and references

- 1 M. Cococcioni, & S. De Gironcoli, Linear response approach to the calculation of the effective interaction parameters in the LDA+ U method, *Physical Review B* **71**, 035105 (2005).
- 2 P. Giannozzi, S. Baroni, N. Bonini, M. Calandra, R. Car, C. Cavazzoni, D. Ceresoli, G. Chiarotti, M. Cococcioni, I. Dabo, & Others, QUANTUM ESPRESSO: a modular and open-source software project for quantum simulations of materials, *Journal Of Physics: Condensed Matter* **21**, 395502 (2009).
